# Supplementary material
Source: MDPI journal article supplement (https://www.mdpi.com/2073-4441/14/3/488)
Supplement: s1 [file s1]

# Simulating discharge in a non-dammed river of Southeastern South America using SWAT model

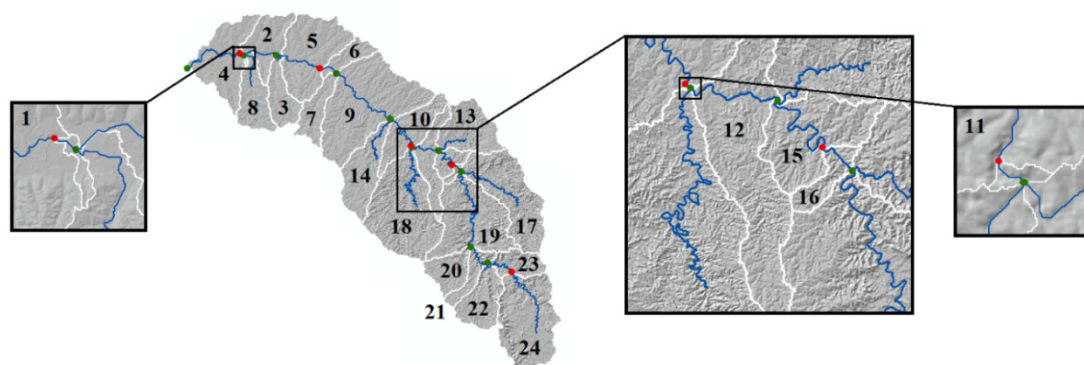

**Figure S1:** Identification of delineated subbasins of Ivaí River Basin.

**Table S1:** Detailing of the Ivaí Rivers subbasins with number and name of the main tributary. Area, altitude, number of Hydrologic Response Unit per subbasin are also identified.

| Subbasin | Tributary                                            | Area (km <sup>2</sup> ) | Altitude |         |         | HRU |
|----------|------------------------------------------------------|-------------------------|----------|---------|---------|-----|
|          |                                                      |                         | Mean     | Minimum | Maximum |     |
| 1        | Ivaí River                                           | 24.08                   | 283.43   | 232     | 380     | 25  |
| 2        | Bonito River                                         | 1,228.31                | 344.46   | 232     | 524     | 21  |
| 3        | Tapiracuí River                                      | 932.78                  | 393.70   | 235     | 540     | 18  |
| 4        | Ribeirão Tamanduá and Córrego do 215                 | 2,188.17                | 320.31   | 187     | 497     | 22  |
| 5        | Ribeirão Paixão and Ribeirão Paranaíba               | 2,597.81                | 371.80   | 230     | 546     | 25  |
| 6        | Ribeirão Inhuma                                      | 598.27                  | 404.73   | 239     | 586     | 24  |
| 7        | Rio dos Índios                                       | 906.13                  | 448.67   | 253     | 624     | 27  |
| 8        | Ribeirão das Antas                                   | 1,217.29                | 361.98   | 230     | 517     | 22  |
| 9        | Ribeirão Paranhos, Ligeiro River and Claro River     | 4,416.82                | 433.86   | 236     | 681     | 18  |
| 10       | Ribeirão Keller, Arurão River and Ribeirão Barbacena | 1,400.62                | 429.57   | 268     | 808     | 19  |
| 11       | Ivaí River                                           | 2.48                    | 326.28   | 279     | 377     | 11  |
| 12       | Ribeirão Cambará and Rio da Bulha                    | 1,042.88                | 508.95   | 273     | 881     | 22  |
| 13       | Bom River                                            | 1,631.44                | 621.94   | 324     | 1,192   | 19  |
| 14       | Mourão River                                         | 1,648.85                | 582.70   | 284     | 853     | 10  |
| 15       | Ivaí River                                           | 436.85                  | 484.54   | 323     | 723     | 32  |

| Subbasin | Tributary                                                         | Area (km <sup>2</sup> ) | Altitude |         |         | HRU |
|----------|-------------------------------------------------------------------|-------------------------|----------|---------|---------|-----|
|          |                                                                   |                         | Mean     | Minimum | Maximum |     |
| 16       | Ivaí River                                                        | 111.65                  | 528.92   | 357     | 687     | 31  |
| 17       | Alonzo River                                                      | 2,823.10                | 667.25   | 373     | 1,278   | 38  |
| 18       | Curumbataí River                                                  | 3,615.99                | 600.71   | 292     | 1,158   | 31  |
| 19       | Rio do Peixe, Branco River, Maria Flora River and Borboleta River | 2,991.96                | 680.58   | 366     | 1,109   | 43  |
| 20       | Pitanga River                                                     | 912.65                  | 899.13   | 453     | 1,252   | 35  |
| 21       | Bonito River                                                      | 618.20                  | 849.61   | 450     | 1,205   | 45  |
| 22       | Marrecas River                                                    | 1,294.49                | 959.80   | 466     | 1,335   | 45  |
| 23       | Ribeirão dos Índios                                               | 767.30                  | 715.40   | 469     | 1,145   | 24  |
| 24       | Rio dos Patos and São João                                        | 3,181.46                | 801.90   | 480     | 1,331   | 46  |

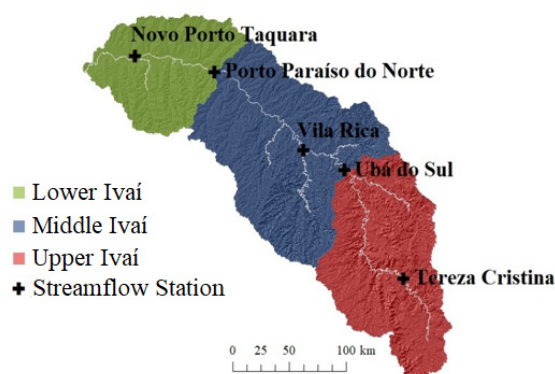

**Figure S2:** Ivaí River main areas used to regionalize parameters during calibration. Upper Ivaí River in red drains Tereza Cristina and Ubá do Sul streamflow stations; Middle Ivaí in blue drains Vila Rica and Porto Paraíso do Norte and Lower Ivaí in green draining Novo Porto Taquara and subbasin 4.

**Table S2:** Summary statistics for calibration and validation (inside brackets) periods of the SWAT modeling for the five fluviometric stations of IRB model.

|                        | Drainage Area (km <sup>2</sup> ) | 95PPU          |                | Best Simulation (Calibration $n = 129$ , Validation $n = 18$ ) |                |                 |                                                    |                                      |
|------------------------|----------------------------------|----------------|----------------|----------------------------------------------------------------|----------------|-----------------|----------------------------------------------------|--------------------------------------|
|                        |                                  | P-factor       | R-factor       | NSE                                                            | RSR            | PBIAS           | Simulated (Standard Deviation) [m <sup>3</sup> /s] | Observed [m <sup>3</sup> /s]         |
| <b>Tereza Cristina</b> | 3,572                            | 0.70<br>(0.88) | 0.72<br>(1.05) | 0.89<br>(0.86)                                                 | 0.33<br>(0.37) | 6.70<br>(10.20) | 80.18 ± 69.42<br>(43.93 ± 40.12)                   | 85.94 ± 75.31<br>(48.91 ± 42.48)     |
| <b>Ubá do Sul</b>      | 12,701                           | 0.73<br>(0.92) | 0.83<br>(1.30) | 0.86<br>(0.81)                                                 | 0.37<br>(0.43) | 6.00<br>(12.20) | 286.41 ± 245.06<br>(155.00 ± 143.13)               | 304.77 ± 233.59<br>(176.60 ± 125.93) |

|                           |        |                |                |                |                |                  |                                      |                                      |
|---------------------------|--------|----------------|----------------|----------------|----------------|------------------|--------------------------------------|--------------------------------------|
| Vila Rica                 | 19,300 | 0.67<br>(0.92) | 0.49<br>(0.92) | 0.70<br>(0.83) | 0.55<br>(0.42) | 16.0<br>(2.40)   | 448.14 ± 306.84<br>(278.70 ± 188.05) | 533.64 ± 504.30<br>(285.45 ± 230.06) |
| Porto Paraíso<br>do Norte | 28,427 | 0.92<br>(0.96) | 1.00<br>(1.45) | 0.88<br>(0.85) | 0.35<br>(0.39) | -3.90<br>(-3.00) | 625.01 ± 383.60<br>(399.08 ± 251.76) | 601.39 ± 393.23<br>(387.47 ± 238.07) |
| Novo Porto<br>Taquara     | 34,432 | 0.83<br>(0.88) | 0.91<br>(1.25) | 0.87<br>(0.83) | 0.36<br>(0.42) | 8.80<br>(11.20)  | 655.04 ± 422.62<br>(427.90 ± 280.05) | 717.88 ± 439.61<br>(481.87 ± 276.99) |

### Parameter Assessment:

Sensitivity analysis performed within SWAT-CUP indicated that simulations were sensitive to 11 of 15 parameters listed in Table 2, which are related to groundwater, runoff, and evaporation processes, as well as soil and vegetation interactions. The parameters selection was based on parameterization of the three main portions of IRB; 29 parameters were selected from 54 possibilities (see Table 2, every parameter was discretized per basin's section apart from the determination of four land use classes to CANMX parameters – maximum canopy storage), and details from calibrated parameters are shown in Table 3.

From the best iteration, Global Sensitivity analysis was performed so parameters could be ranked based on the regression coefficients measured by SWAT-CUP module. Results from the second iteration showed that the groundwater delay time (GW\_DELAY) from the Upper Ivaí is the most sensitive parameter and presented values up to 92.5 days to water move from the lowest depth of the soil profile before becoming shallow aquifer recharge. In agreement with the investigated area, Hu et al. [1] found out that the influences of granular rocks on the Guarani aquifer produce a faster response to rainfall, with lag ranging up to one to three months. For the other portions of the basin, according to the same study, the lag was also for three months. During calibration, the modification ranges were 33 to 112 days, in the Middle Ivaí, and 0 to 100 days, in the Lower Ivaí.

The second most sensitive parameter is CN2, specified for the Middle Ivaí, as well as the fourth most sensitive to the upstream portion. CN2.mgt belongs to the management files that summarize HRU practices of land and water management within the HRU. The CN2 parameter is defined as the initial Soil Conservation Service runoff number for moisture condition II (SCS; [2]), which ranges from 35 to 98 and it is associated to the land use, treatment or practice of the cover, hydrologic condition, and soil group. As this parameter is distributed, the proposed alteration shall respect the HRU characteristics individually. Thus, the initial multiplying value was  $\pm 20\%$ . Initial modifying ranges were reduced to 66%, 98% and 56.5% for the Upper, Middle and Lower portions respectively as identified in the Remaining Modification Interval percentages (RMI; the ratio between the final calibrated range from the best iteration and the modification range allowed by the model). The average curve number found for the IRB was 61.2.

The deep aquifer percolation fraction from the root zone (RCHRG\_DP) is the third most sensitive parameter for the Middle portion of IRB. The final calibrated range was 0.29 – 0.88 and for the best simulation ( $n = 129$ ), the fraction of 0.30 portrays only 2% of the incoming precipitation going to deep aquifer recharge. Other studies on SWAT applications inside Upper Paraná River Basin (UPRB) also relied on the maximum interval admitted by the model (0 – 1; [3–5]). For upstream and downstream, maximum values of modification after the iteration were 0.54 and 0.60, respectively, and the minimum value for both areas was zero since only positive values are acceptable for RCHRG\_DP.

The initial value set for GWQMN was 1000 (in millimeters); meaning that to the return flow from the shallow aquifer occurs, the threshold of one meter must be achieved. For the Upper Ivaí, the GWQMN was the fifth sensitive parameter, and the final modification threshold was between 910.1 and 2,731.8 mm. For the Middle Ivaí, the minimum value was zero and 859 mm for the lower portion. Bressiani [6] established GWQMN ranging from 3,000 to 4,000 mm in an application within the UPRB, as well as in Monteiro

et al. [3] that allowed a modification range between 0 to 3,000 mm thresholds. The last application presented the same initial range as this study, as shown in Table 2, where the initial value is 1000 mm with change being the addition of -1000 to 2000 mm.

The compensation factor for soil evaporation (ESCO) ranges between 0.1 and 1.0. In a general analysis, this parameter was sensitive to the entire basin since it was rated as the 6th, 8th and 9th position for the Upper, Middle and Lower Ivaí. During calibration, the initial value (0.95) was adjusted to reduce the evapotranspiration. For the modification ranges, possible values were kept inside the 0.55 and 0.76 intervals, aligned with results found in others UPRB applications [7–9]. However, other applications [10, 3, 11] found smaller values for the best simulation (0.1; 0.16 and 0.44; 0.5, respectively). ESCO is a calibration parameter and not a property that can be directly measured [12].

Surface runoff lag coefficient (SURLAG) was sensitive to only one portion of the IRB. This parameter is a model feature to lag the surface runoff release to the main channel. It measures the time of concentration in hours and the smallest possible value is 0.5 reaching up to 24. The initial value entered for the Middle Ivaí was 2, as smaller values of SURLAG smooth streamflow hydrograph simulated in the reach [13]. For the other portions, the parameter was set equal to 4 (default). UPRB applications showed a great variability of SURLAG. For the best simulation, Eduardo et al. [9] found 2.26 in the Mortes River in Minas Gerais State and the highest value was 23.05 in Sarapuí River, a Tietê tributary in São Paulo State [8].

The available water capacity of the soil layer (SOL\_AWC) was calibrated to the whole basin as a relative parameter. The initial multiplication allowed a variation of  $\pm 20\%$  attributed to the input data previously defined as soil properties during the model construction. In an overall interpretation, the Upper and Middle segments had SOL\_AWC values reduced, as the final modification interval are predominantly negative, unlike the Lower Ivaí where modifications were mostly increments.

The parameter that governs the water that is removed from the capillary fringe or deep-rooted plants is the GW\_REVAP. Such removed water is replaced by the underlying aquifer. Values should be between 0.02 and 0.20. During calibration, the entire basin parameters were modified by replacement modification with a minimum value of 0.02 and a maximum of 0.083. Hernandez et al. [14] and Eduardo et al. [80] found GW\_REVAP within this interval, with values for their best simulation of 0.2 and 0.8 for the first application and 0.48 for the second.

Baseflow and groundwater recharge were previously treated with a baseflow filter developed by Arnold and Allen [15] available in SWAT website (<https://swat.tamu.edu/media/70817/baseflow2006-06.zip>). This filter allows the estimation of baseflow and groundwater recharge from streamflow records and limits the dependence of the model results on rainfall [16]. Streamflow data were computed in a daily time step to each year of the calibration period and the average value was attributed as an initial parameter setting (ALPHA\_BF). This procedure was applied for the five fluvio-metric stations of IRB. Since Upper and Middle Ivaí includes two stations and Lower Ivaí only one, the calibration was arranged to attend this particular feature. Modification ranges were identical, but initial values were distinct. The final modification interval proposed up to 31.7% addition for the Upper Ivaí. For the best simulation, the final aggregated value was 28.8%, resulting in an ALPHA\_BF of 0.12 for subbasin 24 and 0.08 for the remaining area of Upper Ivaí. Theoretical documentation indicates that values ranging from 0.1 to 0.3 concerns to land with slow response to recharge [13].

The maximum canopy storage parameter (CANMX) belongs to the land cover characteristics at an HRU level. It complements the surface runoff calculation by limiting the maximum amount of water trapped in a fully developed canopy (mm H<sub>2</sub>O). It plays an important role in the rainfall abstraction control, and its values can be assigned between 0 and 100. For the best iteration, the minimum value was 3.50 and the maximum 18.06. Other applications within UPRB found the maximum limit modification of 25 [6], 30 [7, 17], 40 [3] and 100 [18].

The plant uptake compensation factor, EPCO, allows lower layers of the soil to compensate the amount of water available in the upper layer to meet the potential water uptake required to plant transpiration. EPCO can range from 0.01 to 1.00, where higher values allow more water uptake demand. The initial modification range used the whole interval accepted by the model, thus this parameter was not regionalized. During calibration, the model used the 0.44 to 1.0 and 0.41 to 1.0 to the Lower and Middle Ivaí, respectively, and for the Upper, the interval was between 0 and 0.62. For the best simulation, the Upper received value of the 0.4, and the remainder basin received 1. When it concerns other studies, the smaller value found within the UPRB was 0.1 attributed to Mortes River (Minas Gerais State [9]), and the highest was 1 in the Santa Maria/Torto basin (Federal District [10]). The introduction should briefly place the study in a broad context and highlight why it is important. It should define the purpose of the work and its significance. The current state of the research field should be carefully reviewed, and key publications cited. Please highlight controversial and diverging hypotheses when necessary.

**Table S3: Flow threshold indices.**

| Simulated (Observed)          | Q <sub>10</sub>        | Q <sub>50</sub>    | Q <sub>90</sub>    | Q <sub>95</sub>    | Q <sub>10</sub> /Q <sub>50</sub> | Q <sub>90</sub> /Q <sub>50</sub> | Q <sub>10</sub> /Q <sub>90</sub> |
|-------------------------------|------------------------|--------------------|--------------------|--------------------|----------------------------------|----------------------------------|----------------------------------|
| <b>Tereza Cristina</b>        | 173.05<br>(192.52)     | 63.55<br>(61.44)   | 7.09 (18.51)       | 2.31 (14.45)       | 2.723<br>(3.133)                 | 0.111<br>(0.301)                 | 24.407<br>(10.400)               |
| <b>Ubá do Sul</b>             | 640.76<br>(600.57)     | 222.12<br>(235.25) | 23.96<br>(83.05)   | 7.94 (69.64)       | 2.884<br>(2.552)                 | 0.107<br>(0.353)                 | 26.742<br>(7.231)                |
| <b>Vila Rica</b>              | 886.72<br>(1,098.65)   | 361.77<br>(339.42) | 123.64<br>(121.89) | 94.94<br>(88.38)   | 2.451<br>(3.236)                 | 0.341<br>(0.359)                 | 7.171<br>(9.013)                 |
| <b>Porto Paraíso do Norte</b> | 1,167.70<br>(1,096.03) | 545.33<br>(482.32) | 221.67<br>(209.38) | 188.69<br>(196.96) | 2.141<br>(2.272)                 | 0.406<br>(0.434)                 | 5.267<br>(5.234)                 |
| <b>Novo Porto Taquara</b>     | 1,218.86<br>(1,301.06) | 557.45<br>(594.03) | 220.61<br>(280.29) | 184.79<br>(264.02) | 2.186<br>(2.190)                 | 0.395<br>(0.471)                 | 5.524<br>(4.641)                 |

## References

1. Hu, K.; Awange, J. L.; Khandu, Forootan, E.; Goncalves, R. M.; Fleming, K. Hydrogeological characterisation of groundwater over Brazil using remotely sensed and model products. *Science of the Total Environment* **2017**, 599–600, 372–386. <https://doi.org/10.1016/j.scitotenv.2017.04.188>
2. Cronshey, R. (1986). *Urban Hydrology for Small Watersheds*. US Dept. of Agriculture, Soil Conservation Service, Engineering Division: Washington, United States of America, 1986.
3. Monteiro, J. A. F.; Kamali, B.; Srinivasan, R.; Abbaspour, K.; Gücker, B. Modelling the effect of riparian vegetation restoration on sediment transport in a human-impacted Brazilian catchment. *Ecohydrology* **2016**, 9(7), 1289–1303. <https://doi.org/10.1002/eco.1726>
4. Andrade, M. A.; Mello, C. R. de; Beskow, S. Simulação hidrológica em uma bacia hidrográfica representativa dos Latossolos na região Alto Rio Grande, MG. *Revista Brasileira de Engenharia Agrícola e Ambiental* **2013**, 17(1), 69–76. <https://doi.org/10.1590/S1415-43662013000100010>
5. Dias, V. de S.; da Luz, M. P.; Medero, G. M.; Nascimento, D. T. F.; de Oliveira, W. N.; Merelles, L. R. de O. (2018). Historical streamflow series analysis applied to furnas HPP reservoir watershed using the SWAT model. *Water* **2018**, 10(4), 1–13. <https://doi.org/10.3390/w10040458>
6. Bressiani, D. D. A. (2016). Coping with hydrological risks through flooding risk index, complex watershed modeling, different calibration techniques, and ensemble streamflow forecasting. Doctoral's Thesis, University of São Paulo. 10.11606/T.18.2017.tde-04042017-155701
7. de Oliveira, V. A.; de Mello, C. R.; Viola, M. R.; Srinivasan, R. Assessment of climate change impacts on streamflow and hydropower potential in the headwater region of the Grande river basin, Southeastern Brazil. *International Journal of Climatology* **2017**, 37(15), 5005–5023. <https://doi.org/10.1002/joc.5138>

8. Mello, K. de; Randhir, T. O.; Valente, R. A.; Vettorazzi, C. A. Riparian restoration for protecting water quality in tropical agricultural watersheds. *Ecological Engineering* **2017**, *108*, 514–524. <https://doi.org/10.1016/j.ecoleng.2017.06.049>
9. Eduardo, E. N.; Mello, C. R.; de Viola, M. R.; Owens, P. R.; Curi, N. Hydrological simulation as subside for management of surface water resources at the Mortes River Basin. *Ciência e Agrotecnologia* **2016**, *40*(4), 390–404. <https://doi.org/10.1590/1413-70542016404009516>
10. Strauch, M.; Schürz, C.; Schweppe, R. topHRU - threshold optimization for HRUs in SWAT. *Zenodo* **2017**. <https://doi.org/10.5281/zenodo.154379>
11. Bonuma, N.; Reichert, J. M.; Rodrigues, M. F. (2015). Modeling Surface Hydrology, Soil Erosion, Nutrient Transport, and Future Scenarios with the Ecohydrological SWAT Model in Brazilian Watersheds and River Basins. *Tópicos em Ciência do Solo* **2015**, 241–290.
12. Feyereisen, G. W., Strickland, T. C., Bosch, D. D., & Sullivan, D. G. Evaluation of SWAT manual calibration and input parameter sensitivity in the Little River watershed. *Transactions of the ASABE* **2007**, *50*(3), 843–855. <https://doi.org/10.13031/2013.23149>
13. Neitsch, S. L.; Arnold, J. G.; Kiniry, J. R.; Williams, J. R. *Theoretical documentation Soil and Water Assessment Tool version 2009*. Texas Water Resources Institute: College Station, TX, USA, 2011.
14. Hernandez, T. A. D.; Scarpere, F. V.; Seabra, J. E. A. Assessment of impacts on basin stream flow derived from medium-term sugarcane expansion scenarios in Brazil. *Agriculture, Ecosystems and Environment* **2018**, *259*(February), 11–18. <https://doi.org/10.1016/j.agee.2018.02.026>
15. Arnold, J. G.; Allen, P. M. Automated Methods for Estimating Baseflow and Ground Water Recharge From Streamflow Records. *Journal of the American Water Resources Association* **1999**, *35*(2). <https://doi.org/10.1111/j.1752-1688.1999.tb03599.x>
16. Kim, H. S. Application of a baseflow filter for evaluating model structure suitability of the IHACRES CMD. *Journal of Hydrology* **2015**, *521*, 543–555. <https://doi.org/10.1016/j.jhydrol.2014.12.030>
17. Pontes, L. M.; Viola, M. R.; Naves Silva, M. L.; Bispo, D. F. A.; Curi, N. Hydrological modeling of tributaries of cantareira system, southeast brazil, with the swat model. *Engenharia Agrícola* **2016**, *36*(6), 1037–1049. <https://doi.org/10.1590/1809-4430-Eng.Agric.v36n6p1037-1049/2016>
18. Brighenti, T. M.; Bonumá, N. B.; Chaffe, P. L. B.. Calibração hierárquica do modelo SWAT em uma bacia hidrográfica Catarinense. *Revista Brasileira de Recursos Hídricos* **2016**, v. 21, n. 1, p. 53–64. <https://doi.org/10.21168/rbrh.v21n1.p53-64>
